# Supplementary material for: Characterization of the Water Supply of the Rio Grande Project Based on Rio Grande Compact Reports 1940–2020
Source: Atypon-hosted journal article supplement (doi:10.1061/jwrmd5.wreng-6155), 2024-02-01
Supplement: supplemental_materials_jwrmd5.wreng-6155_trueblood.pdf [file supplemental_materials_jwrmd5.wreng-6155_trueblood.pdf]

## SUPPLEMENTAL MATERIALS

*ASCE Journal of Water Resources Planning and Management*

# Characterization of the Water Supply of the Rio Grande Project Based on Rio Grande Compact Reports 1940–2020

Claudia Trueblood, Soyoung Jeon, Christopher Brown,  
and J. Phillip King

**DOI:** 10.1061/JWRMD5.WRENG-6155

© ASCE 2023

[www.ascelibrary.org](http://www.ascelibrary.org)

## 1. Introduction

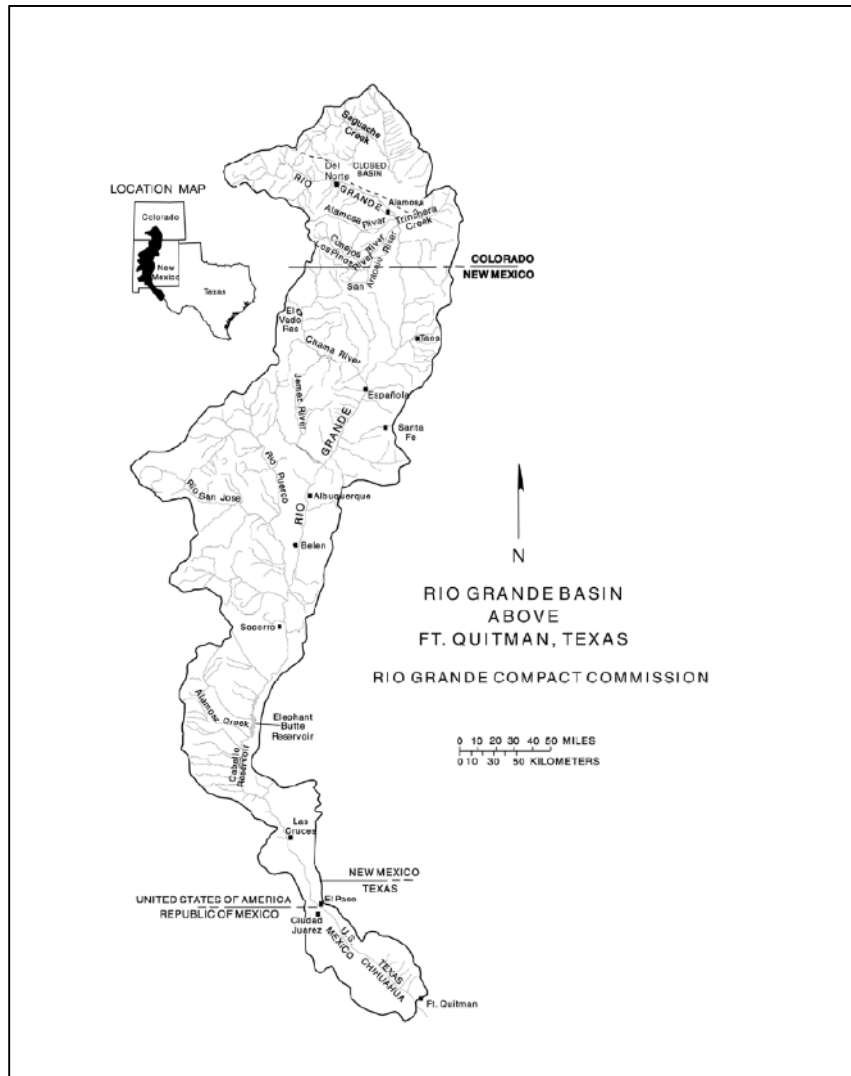

Fig. S1. Map of geographical location encompassed by the Rio Grande. (Reprinted from Rio Grande Compact Report 2020.)

## 2. Data

For the years of record, 1940 to 2020, we organized the Index Supply, Scheduled Delivery, Actual Delivery, and credits and debits series for Colorado and for New Mexico into Table S1. The units are thousand-acre feet (KAF). The data used in this study for years 2011 to 2020 is the one called Method 1 in the Compact Reports. Since 2011 there has not been consensus regarding the Compact accounting between the engineer advisors who represent the participating States so different methods of accounting have been proposed and used since then. The reasons for the disagreement from 2011 to 2020 are different from each State; however, the main reasons relate to claims from Colorado and New Mexico

for the “unauthorized release” of water by the U.S. Bureau of Reclamation, the source of the water, and account for deliveries from Colorado and New Mexico. Details about the lack of consensus between the States are in the addenda to the Compact Commission Reports for those years (Rio Grande Compact Reports, 2011-2020).

Table S1. Index Supply, Scheduled Delivery, Actual Delivery, and credits and debits for Colorado and for New Mexico, 1940 to 2020. Thousand-acre feet (KAF).

| Year | Conejos Index | Conejos Scheduled | Rio Grande Index | Rio Grande Scheduled | Total Scheduled | Lobatos Actual+10k | CR/DR  | Elephant Butte Scheduled | Elephant Butte Actual | CR/DR  |
|------|---------------|-------------------|------------------|----------------------|-----------------|--------------------|--------|--------------------------|-----------------------|--------|
| 1940 | 220.5         | 57.3              | 312              | 77.7                 | 135             | 115.7              | -19.3  | 334.6                    | 276.2                 | -58.4  |
| 1941 | 583.7         | 357.7             | 1025.8           | 458.4                | 816.1           | 964.3              | 148.2  | 2318.5                   | 2425.5                | 107    |
| 1942 | 394.9         | 183.8             | 848              | 290.6                | 474.4           | 695.2              | 220.8  | 1824.6                   | 1811                  | -13.6  |
| 1943 | 280.4         | 95.7              | 198.2            | 126.5                | 222.2           | 193.5              | -28.7  | 395.6                    | 337.2                 | -58.4  |
| 1944 | 427.1         | 211.8             | 850.4            | 292.3                | 504.1           | 616.3              | 112.2  | 956                      | 876.9                 | -79.1  |
| 1945 | 355.9         | 151.8             | 538              | 139.9                | 291.7           | 287                | -4.7   | 785.6                    | 768.4                 | -17.2  |
| 1946 | 197.7         | 43.8              | 128.3            | 105.9                | 149.7           | 125.2              | -24.5  | 220.3                    | 265.9                 | 45.6   |
| 1947 | 306           | 113.6             | 639.8            | 177.9                | 291.5           | 240.3              | -51.2  | 429.2                    | 361.4                 | -67.8  |
| 1948 | 304.2         | 183.2             | 907.9            | 342.11               | 525.31          | 674.2              | 148.9  | 1033.6                   | 919.7                 | -113.9 |
| 1949 | 411.5         | 198.1             | 919.5            | 352.6                | 550.7           | 582.7              | 32     | 941.3                    | 942.5                 | 1.2    |
| 1950 | 226.4         | 60.8              | 470.1            | 118                  | 178.8           | 142.1              | -36.7  | 281.5                    | 298.1                 | 16.6   |
| 1951 | 162.2         | 26.1              | 308.8            | 76.9                 | 103             | 84.3               | -18.7  | 204.2                    | 135.5                 | -68.7  |
| 1952 | 581.2         | 357.2             | 826              | 275.2                | 632.4           | 478.4              | -154   | 1019                     | 897.6                 | -121.4 |
| 1953 | 211.4         | 51.8              | 401.3            | 98.4                 | 150.2           | 132.1              | -18.1  | 299.2                    | 273.5                 | -25.7  |
| 1954 | 183.2         | 36.6              | 381.1            | 93.5                 | 130.1           | 69.6               | -60.5  | 246.2                    | 232                   | -14.2  |
| 1955 | 186.3         | 38.2              | 368.5            | 90.4                 | 128.6           | 73.1               | -55.5  | 250.4                    | 269.7                 | 19.3   |
| 1956 | 226.8         | 61.1              | 333.5            | 82.4                 | 143.5           | 80.6               | -62.9  | 205.1                    | 153                   | -52.1  |
| 1957 | 547.4         | 323.5             | 843.7            | 287.6                | 611.1           | 454.9              | -156.2 | 1068.5                   | 1127.9                | 59.4   |
| 1958 | 345.3         | 143.4             | 723.9            | 216                  | 359.4           | 372.5              | 13.1   | 1102.1                   | 1103.9                | 1.8    |
| 1959 | 168.2         | 29.1              | 367.2            | 90.1                 | 119.2           | 98.4               | -20.8  | 242.4                    | 213.2                 | -29.2  |
| 1960 | 297.2         | 107.1             | 602.4            | 163                  | 270.1           | 211                | -59.1  | 470.2                    | 520                   | 49.8   |
| 1961 | 296.8         | 106.8             | 500.3            | 127.1                | 233.9           | 179.2              | -54.7  | 463.6                    | 510.3                 | 46.7   |
| 1962 | 390.7         | 180.4             | 756.6            | 232.7                | 413.1           | 326.2              | -86.9  | 669.3                    | 721.3                 | 52     |
| 1963 | 156.1         | 23                | 329.5            | 81.5                 | 104.5           | 82.6               | -21.9  | 237.7                    | 231                   | -6.7   |
| 1964 | 213.8         | 53.3              | 369.3            | 90.6                 | 143.9           | 67.6               | -76.3  | 225                      | 158.7                 | -66.3  |
| 1965 | 501           | 279               | 929.1            | 361.2                | 640.2           | 510.6              | -129.6 | 983.6                    | 951.4                 | -32.2  |
| 1966 | 282.1         | 96.8              | 578.8            | 154.4                | 251.2           | 265.4              | 14.2   | 467                      | 487.4                 | 20.4   |
| 1967 | 271.7         | 89.8              | 399.6            | 97.9                 | 187.7           | 170.4              | -17.3  | 325.9                    | 366.9                 | 41     |
| 1968 | 327.8         | 130.1             | 669              | 190.4                | 320.5           | 340.8              | 20.3   | 521.1                    | 604.6                 | 83.5   |
| 1969 | 383.9         | 174.8             | 657.6            | 185.3                | 360.1           | 425.1              | 65     | 769.5                    | 882                   | 112.5  |
| 1970 | 316.1         | 121.2             | 654.7            | 184.1                | 305.3           | 333.5              | 28.2   | 493.9                    | 525.3                 | 31.4   |
| 1971 | 221.2         | 57.7              | 484.4            | 122.3                | 180             | 216.8              | 36.8   | 325                      | 367.8                 | 42.8   |
| 1972 | 157.9         | 24                | 477.3            | 120.2                | 144.2           | 172.3              | 28.1   | 271.1                    | 424.7                 | 153.6  |
| 1973 | 447.2         | 229.5             | 832.2            | 279.5                | 509             | 530.7              | 21.7   | 1171.3                   | 1098.4                | -72.9  |
| 1974 | 193.8         | 41.9              | 337.5            | 83.2                 | 125.1           | 131.5              | 6.4    | 257.2                    | 305.9                 | 48.7   |
| 1975 | 416.4         | 202.4             | 807.1            | 262                  | 464.4           | 476.7              | 12.3   | 786.8                    | 849.8                 | 63     |
| 1976 | 272.9         | 90.6              | 589.9            | 158.4                | 249             | 259                | 10     | 395.3                    | 378.9                 | -16.4  |

|      |       |       |        |       |       |       |       |        |        |        |
|------|-------|-------|--------|-------|-------|-------|-------|--------|--------|--------|
| 1977 | 96.4  | 0     | 215.3  | 61.5  | 61.5  | 71.2  | 9.7   | 169    | 201.5  | 32.5   |
| 1978 | 248.9 | 74.3  | 406.1  | 99.7  | 174   | 184.5 | 10.5  | 405.4  | 377.6  | -27.8  |
| 1979 | 476.9 | 256.7 | 953.7  | 383.7 | 640.4 | 635.8 | -4.6  | 1483.7 | 1381.9 | -101.8 |
| 1980 | 422.7 | 208   | 750.1  | 229.1 | 437.1 | 461.7 | 24.6  | 988.3  | 967    | -21.3  |
| 1981 | 169.8 | 29.9  | 409.3  | 100.6 | 130.5 | 141.5 | 11    | 237.8  | 187.5  | -50.3  |
| 1982 | 450   | 232   | 697.5  | 202.9 | 434.9 | 449.7 | 14.8  | 784.7  | 810.4  | 25.7   |
| 1983 | 387.9 | 178.1 | 672.8  | 192   | 370.1 | 397.7 | 27.6  | 998.5  | 1044.2 | 45.7   |
| 1984 | 382.6 | 173.7 | 761.6  | 235.5 | 409.2 | 425.1 | 15.9  | 939.7  | 942.1  | 2.4    |
| 1985 | 577.7 | 353.7 | 1007.2 | 437.9 | 791.6 | 887.1 | 95.5  | 1764.1 | 1291.8 | -472.3 |
| 1986 | 478.3 | 258   | 1032.8 | 466.1 | 724.1 | 814.2 | 90.1  | 1400.9 | 1569   | 168.1  |
| 1987 | 361.9 | 156.8 | 1017   | 448.7 | 605.5 | 843.4 | 237.9 | 1257.4 | 1262.1 | 4.7    |
| 1988 | 202.1 | 46.3  | 434.8  | 107.7 | 154   | 194.7 | 40.7  | 623.2  | 685.6  | 62.4   |
| 1989 | 247.4 | 73.4  | 494.1  | 125.2 | 198.6 | 219.5 | 20.9  | 414.7  | 393.2  | -21.5  |
| 1990 | 198   | 44    | 524    | 135.2 | 179.2 | 184   | 4.8   | 388.6  | 357.7  | -30.9  |
| 1991 | 361   | 156   | 605.5  | 164.2 | 320.2 | 321.4 | 1.2   | 837.8  | 942.1  | 104.3  |
| 1992 | 254.8 | 78.3  | 484.5  | 122.4 | 200.7 | 250.6 | 49.9  | 679.3  | 795.5  | 116.2  |
| 1993 | 440.9 | 224   | 655.1  | 184.2 | 408.2 | 409.7 | 1.5   | 1084.5 | 1100.2 | 15.7   |
| 1994 | 350.3 | 147.2 | 539.4  | 140.4 | 287.6 | 296.6 | 9     | 834.6  | 950.3  | 115.7  |
| 1995 | 469.1 | 249.6 | 830.6  | 278.4 | 528   | 537.9 | 9.9   | 1287   | 1172.4 | -114.6 |
| 1996 | 190.8 | 40.4  | 397.6  | 97.4  | 137.8 | 140.2 | 2.4   | 256.5  | 325.3  | 68.8   |
| 1997 | 401.5 | 189.3 | 946.7  | 377   | 566.3 | 567   | 0.7   | 926    | 969.3  | 43.3   |
| 1998 | 266.8 | 86.4  | 577.6  | 153.9 | 240.3 | 249.2 | 8.9   | 536.7  | 596.9  | 60.2   |
| 1999 | 313.3 | 119.1 | 914.2  | 347.8 | 466.9 | 474.4 | 7.5   | 710    | 744.9  | 34.9   |
| 2000 | 142.4 | 17    | 390.8  | 95.8  | 112.8 | 124.2 | 11.4  | 233.3  | 353.6  | 120.3  |
| 2001 | 282.4 | 97    | 725.4  | 216.7 | 313.7 | 300.3 | -13.4 | 494.9  | 416.4  | -78.5  |
| 2002 | 59.7  | 0     | 154.6  | 46.4  | 46.4  | 81    | 34.6  | 145.2  | 284.1  | 138.9  |
| 2003 | 181.3 | 35.6  | 319.2  | 79.2  | 114.8 | 83.8  | -31   | 270.3  | 222.8  | -47.5  |
| 2004 | 265.1 | 85.3  | 527.8  | 136.5 | 221.8 | 226.2 | 4.4   | 371.5  | 407    | 35.5   |
| 2005 | 416.1 | 202.2 | 793.3  | 253.2 | 455.4 | 458   | 2.6   | 949.5  | 957.1  | 7.6    |
| 2006 | 247.9 | 73.7  | 570.3  | 151.3 | 225   | 237.1 | 12.1  | 329.8  | 572.9  | 243.1  |
| 2007 | 280   | 95.4  | 710.2  | 209.1 | 304.5 | 298.9 | -5.6  | 513.5  | 546.3  | 32.8   |
| 2008 | 402.5 | 190.2 | 708.5  | 208.2 | 398.4 | 403.9 | 5.5   | 816.2  | 883.3  | 67.1   |
| 2009 | 350.4 | 147.3 | 592.8  | 159.4 | 306.7 | 299.3 | -7.4  | 540    | 622.9  | 82.9   |
| 2010 | 282.9 | 97.4  | 538.5  | 140.1 | 237.5 | 239.5 | 2     | 535.4  | 620.4  | 85     |
| 2011 | 258.6 | 80.8  | 502.3  | 127.8 | 208.6 | 210   | 1.4   | 328.4  | 281.3  | -47.1  |
| 2012 | 175.2 | 32.6  | 404.1  | 99.1  | 131.7 | 136.5 | 4.8   | 268.4  | 239.8  | -28.6  |
| 2013 | 153   | 21.5  | 458.3  | 114.5 | 136   | 139.6 | 3.6   | 249.8  | 310.1  | 60.3   |
| 2014 | 225.5 | 60.3  | 637.8  | 177.1 | 237.4 | 240.1 | 2.7   | 333    | 284.6  | -48.4  |
| 2015 | 243.8 | 71.3  | 663.5  | 187.9 | 259.2 | 260.4 | 1.2   | 482.1  | 482.5  | 0.4    |
| 2016 | 279.7 | 95.2  | 664.8  | 188.5 | 283.7 | 285.9 | 2.2   | 433    | 412.4  | -20.6  |
| 2017 | 439.5 | 222.8 | 688.2  | 198.8 | 421.6 | 415.4 | -6.2  | 853    | 871.7  | 18.7   |
| 2018 | 160.4 | 25.2  | 277.4  | 70.5  | 95.7  | 99.2  | 3.5   | 178.1  | 184.2  | 6.1    |
| 2019 | 430.5 | 214.8 | 925.8  | 358.2 | 573   | 571.3 | -1.7  | 957.4  | 914.2  | -43.2  |
| 2020 | 167.5 | 28.8  | 376.4  | 92.3  | 121.1 | 121.7 | 0.6   | 241.3  | 182.9  | -58.4  |

### 3. Methods

3.1. Transfer Function Model (TFM). The TFM is explicitly written as:

$$\delta(B)Y_t = \omega(B)X_{t-b} + \eta_t \quad (S1)$$

where  $b$  is the delay parameter in the input system;  $\eta_t$  is the noise component with an autoregressive moving average form;  $\delta(B)$  and  $\omega(B)$  are components that make up the transfer function, where

$$\delta(B) = 1 - \delta_1 B - \delta_2 B^2 - \dots - \delta_r B^r \quad (S2)$$

and

$$\omega(B) = \omega_0 - \omega_1 B - \omega_2 B^2 - \dots - \omega_s B^s \quad (S3)$$

where  $r$  and  $s$  are the orders of the polynomials on  $B$ , the backshift operator defined as

$B^r Y_t = Y_{t-r}$  (Box and Jenkins 1976). As affirmed by the studies of Quilez et al. (1992) and Salmani and Jajaei (2016), the advantage of this model is that the TFM explains more of the variance especially in cases where the relationship between the time series is not instantaneous and offers more accurate predictions.

3.2. Model selection. The model selection was primarily based on the Akaike Information Criterion (AIC), which estimates the prediction error which is an indicator of the relative quality of statistical models considered.

$$\omega(B) = \omega_0 - \omega_1 B - \omega_2 B^2 - \dots - \omega_s B^s \quad (S4)$$

where  $k$  is the number of estimated parameters in the model and  $\hat{L}$  is the maximum values of the likelihood function for the model. The model with the smallest AIC value is chosen as the best model. Two alternative model selection criteria were considered, the Root Mean Square Error (RMSE) and the Mean Absolute Percentage Error (MAPE), to determine which model was most accurate in prediction. RMSE measures the error of a model in forecasting quantitative data, while MAPE is a measure of prediction accuracy of a forecasting method. The formulas of the RMSE and MAPE are:

$$RMSE = \sqrt{\frac{1}{n} \sum_{i=1}^n (F_i - A_i)^2} \quad (S5)$$

and

$$MAPE = \frac{1}{n} \sum_{i=1}^n \left| \frac{A_i - F_i}{A_i} \right| \quad (S6)$$

where  $n$  is the number of observations,  $A_i$  is the  $i$ -th actual value, and  $F_i$  the forecast value of the  $i$ -th observation ( $i = 1, 2, \dots, n$ ).

#### 4. Results and Discussion

To answer the research question that guided the study, we characterized the Schedule Delivery, Actual Delivery, and their difference, annual credits and debits, as well as accrued debits.

##### 4.1. Water availability

We compared the Scheduled, Actual, and credits/debits figures from technical note, Figure 2 for Colorado and Figure 3 for New Mexico. Visually it seems like for both, Colorado and New Mexico, the available levels of water were higher from 1940 to 1984, or what we called Early; and lower between 1985 and 2020, which we defined as Late. Table S2 for Colorado and Table S3 for New Mexico describe the data statistically for Scheduled and Actual.

In Table S2 for Colorado, the mean for Early and Late for Scheduled (312, 305 KAF, 384,846,333 and 376,211,960 m<sup>3</sup> respectively), and for Actual (309, 322 KAF, 381,145,888 and 397,181,152 m<sup>3</sup>) were very similar. The ranges for Early and Late for Scheduled are alike (754, 745 KAF, 930,045,305 and 918,943,968 m<sup>3</sup>), however for the Actual are farther apart, (896, 806 KAF, 1,105,199,726 and 994,186,361 m<sup>3</sup>). The interquartile range, which represents how far apart the lower and the upper measures of the data are, shows that for Scheduled and Actual, the measures for Early are higher (306 and 326 KAF, 377,445,442 and 402,115,079 m<sup>3</sup>) than the measures for Late (257 and 227 KAF, 317,004,832 and 280,000,377 m<sup>3</sup>). Considering the coefficient of variation, is about the same for all combinations, Schedule Delivery Early (SchEarly) (0.60), Schedule Delivery Late (SchLate) (0.60), Actual Delivery Early (ActEarly) (0.68), and Actual Delivery Late (ActLate) (0.64).

Table S2. Descriptive Statistics Scheduled Delivery and Actual Delivery, Early and Late, Colorado, thousand-acre feet (KAF)

| Stat      | Sch CO Early | Sch CO Late | Act CO Early | Act CO Late |
|-----------|--------------|-------------|--------------|-------------|
| Mean      | 312          | 305         | 309          | 322         |
| Median    | 270          | 249         | 259          | 255         |
| Stand Dev | 186          | 183         | 211          | 208         |
| Min       | 61           | 46          | 67           | 81          |
| Max       | 816          | 791         | 964          | 887         |
| Sum       | 14076        | 11014       | 13947        | 11622       |
| Coeff Var | 0.60         | 0.60        | 0.68         | 0.64        |
| Count     | 45           | 36          | 45           | 36          |

Table S3. Descriptive Statistics Scheduled Delivery and Actual Delivery, Early and Late, New Mexico, thousand-acre feet (KAF)

| Stat      | Sch NM Early | Sch NM Late | Act NM Early | Act NM Late |
|-----------|--------------|-------------|--------------|-------------|
| Mean      | 644          | 625         | 644          | 644         |
| Median    | 467          | 524         | 510          | 584         |
| Stand Dev | 465          | 386         | 468          | 360         |
| Min       | 169          | 145         | 135          | 182         |
| Max       | 2318         | 1764        | 2425         | 1569        |
| Sum       | 28998        | 22525       | 28985        | 23206       |
| Coeff Var | 0.72         | 0.62        | 0.73         | 0.56        |
| Count     | 45           | 36          | 45           | 36          |

Table S3 demonstrates that the averages for Early and Late for Scheduled (644, 625 KAF, 794,362,304 and 770,926,148 m<sup>3</sup> respectively), and for Actual (644 and 644 KAF) are all very similar. The range for Early for Scheduled (2,149 KAF, 2,650,752,468 m<sup>3</sup>) is around 530 KAF (653,745,374 m<sup>3</sup>) higher than that for Late (1,618 KAF, 1,995,773,613 m<sup>3</sup>), and for Actual the difference is even broader 903 KAF (1,113,834,099 m<sup>3</sup>), Early (2,290 KAF, 2,824,673,408 m<sup>3</sup>) Late (1,386 KAF, 1,709,605,827 m<sup>3</sup>). The interquartile range shows that for the Scheduled and Actual, the measures for Early are higher (705 and 656 KAF, 869,604,695 and 809,164,085 m<sup>3</sup>) than the measures for Late (520

and 602 KAF, 641,410,556 and 742,556,066 m<sup>3</sup>). Lastly, the coefficient of variation is about the same for Early for Schedule (0.72) and Actual (0.73), and not as close for Late (0.62 for Schedule and 0.56 for Actual).

#### 4.2.Credits and Debits

We looked at the same statistical measures of Early and Late but for the credits and debits, first two columns of Table S4 and Table S5.

Table S4. Descriptive Statistics Summary for Annual Credit/Debit Colorado, thousand-acre feet (KAF)

| Stat      | Early   | Late   | High    | Low     | Early & High (EH) | Early & Low (ELo) | Late & High (LaH) | Late & Low (LaLo) | 1940 - 2020 |
|-----------|---------|--------|---------|---------|-------------------|-------------------|-------------------|-------------------|-------------|
| Mean      | -2.89   | 16.89  | 26.52   | -5.59   | 18.10             | -16.88            | 40.30             | 6.60              | 5.90        |
| Median    | 6.40    | 3.55   | 13.10   | 2.10    | 18.80             | -18.70            | 5.50              | 3.50              | 3.60        |
| Stand Dev | 70.74   | 45.15  | 92.49   | 28.23   | 102.88            | 32.23             | 74.97             | 16.42             | 61.17       |
| Min       | -156.20 | -31.00 | -156.20 | -76.30  | -156.20           | -76.30            | -6.20             | -31.00            | -156.20     |
| Max       | 220.80  | 237.90 | 237.90  | 49.90   | 220.80            | 36.80             | 237.90            | 49.90             | 237.90      |
| Sum       | -129.91 | 608.20 | 769.09  | -290.80 | 325.79            | -455.70           | 443.30            | 164.90            | 478.29      |
| Coeff Var | 24.50   | 2.67   | 3.49    | 5.05    | 5.68              | 1.91              | 1.86              | 2.49              | 10.36       |
| Count     | 45      | 36     | 29      | 52      | 18                | 27                | 11                | 25                | 81          |

Table S5. Descriptive Statistics Summary for Annual Credit/Debit NM, thousand-acre feet (KAF)

| Stat      | Early   | Late    | High    | Low    | Early & High (EH) | Early & Low (ELo) | Late & High (LaH) | Late & Low (LaLo) | 1940-2020 |
|-----------|---------|---------|---------|--------|-------------------|-------------------|-------------------|-------------------|-----------|
| Mean      | -0.28   | 18.93   | 0.76    | 13.67  | -5.41             | 3.46              | 8.57              | 26.32             | 8.25      |
| Median    | 1.20    | 25.75   | 11.65   | 6.10   | 1.20              | 4.95              | 34.90             | 6.10              | 7.60      |
| Stand Dev | 60.97   | 112.60  | 110.77  | 67.00  | 69.97             | 54.61             | 150.04            | 79.32             | 87.66     |
| Min       | -121.40 | -472.30 | -472.30 | -78.50 | -121.40           | -68.70            | -472.30           | -78.50            | -472.30   |
| Max       | 153.60  | 243.10  | 168.10  | 243.10 | 112.50            | 153.60            | 168.10            | 243.10            | 243.10    |
| Sum       | -12.80  | 681.40  | 25.90   | 642.70 | -102.70           | 89.90             | 128.60            | 552.80            | 668.60    |
| Coeff Var | 214.34  | 5.95    | 145.41  | 4.90   | 12.95             | 15.79             | 17.50             | 3.01              | 10.62     |
| Count     | 45      | 36      | 34      | 47     | 19                | 26                | 15                | 21                | 81        |

The mean credit/debit for Early (E) is -2 KAF (2,466,964 m<sup>3</sup>) and for Late (L) it is 16 KAF (19,735,709 m<sup>3</sup>). The range is 377 KAF (465,022,653 m<sup>3</sup>) for E and 268 KAF (330,573,132 m<sup>3</sup>) for La while the IQR is 67 KAF (82,643,283 m<sup>3</sup>) for E and 9 KAF (11,101,337 m<sup>3</sup>) for La. The coefficient of variation, or relative dispersion of the data points around the mean, is much larger in magnitude for E (-24) than for La (2).



The sum of annual credit and debit data for New Mexico for the period of record is -12 KAF (14,801,782 m<sup>3</sup>) for E and 681 KAF (840,001,131 m<sup>3</sup>) for La. The mean for E is -0.28 and for La 18. The range is 275 KAF (339,207,505 m<sup>3</sup>) for E and 715 KAF (881,939,514 m<sup>3</sup>) for La while the IQR is 96.85 KAF (119,462,716 m<sup>3</sup>) for E and 5.95 KAF (7,339,217 m<sup>3</sup>) for La. The coefficient of variation is much higher for E (214) than for La (6). The analysis was expanded to consider all the qualifiers defined in the methods section to make distinctions between hydrological conditions, High (H) and Low (Lo), and Early (E) and Late (La) and their combinations.

Based on the descriptive statistics summary, Table S4 for credits and debits for Colorado, we concluded that the data set EH is the one with the largest spread, suggested by the second highest range (377 KAF, 465,022,653 m<sup>3</sup>), SD (102), and IQR (101 KAF, 124,581,666 m<sup>3</sup>) values. In contrast, the data set that seems to have the least spread is LoLa with the lowest range (80 KAF, 98,678,547 m<sup>3</sup>), SD (16), and IQR (9 KAF, 11,101,337 m<sup>3</sup>). LaH has the largest mean (40 KAF, 49,339,274 m<sup>3</sup>) and it is actually the shortest series (11 data points). EH has the highest median (18 KAF, 22,202,673 m<sup>3</sup>) and it is the second shortest series (18 data points). The series with the largest coefficient of variation (24.50), or largest relative dispersion of data points in the data series around the mean, is E. In contrast to the Colorado credit/debit series, the ones for New Mexico are harder to describe in a summarized way.

#### 4.3. Histograms

To visualize the distribution of the series and their relationships for the High and Low, and Early and Late considerations for the Colorado and New Mexico series, the authors created histograms. Figure S2 for Colorado shows that the H distribution has a larger level of spread than the Lo distribution which is consistent with the values of the descriptive statistics from Table S3. The coefficients of variation are 3 for H and 5 for Lo which means the observations vary similarly in relation to the mean. The H distribution is almost symmetrical and flatter than Lo, while the Lo distribution is skewed to the left, which means the mean (-5 KAF, - 6,167,409 m<sup>3</sup>) is smaller than the median (2 KAF, 2,466,964 m<sup>3</sup>).

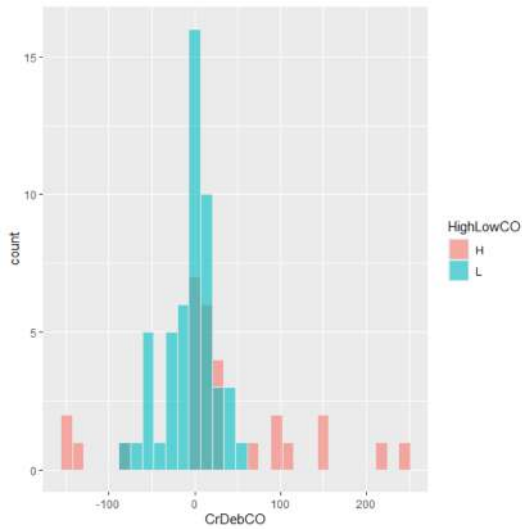

Fig. S2. Histogram Credit/Debit Colorado, High and Low, thousand-acre feet (KAF)

In Figure S3 for New Mexico, the H distribution appears to be more spread out than the Lo one since the debit for 1985 (-472 KAF, 582,203,427 m<sup>3</sup>) is three times larger than the second largest debit (-121 KAF, 149,251,302 m<sup>3</sup>) in 1952. The SD of the H distribution is 110 and 67 for Lo. The Lo distribution is skewed to the right with a mean (13 KAF, 16,035,264 m<sup>3</sup>) larger than the median (6 KAF, 7,400,891 m<sup>3</sup>), while H is skewed to the left, with a median (11 KAF, 13,568,300 m<sup>3</sup>) much larger than the mean (0.76 KAF, 937,446 m<sup>3</sup>). The range of H is almost double that of Lo (640 KAF, 321 KAF, 789,428,376 and 395,947,670 m<sup>3</sup>), while the IQRs are similar in size (97 KAF, 95 KAF, 119,647,738 and 117,180,775 m<sup>3</sup>).

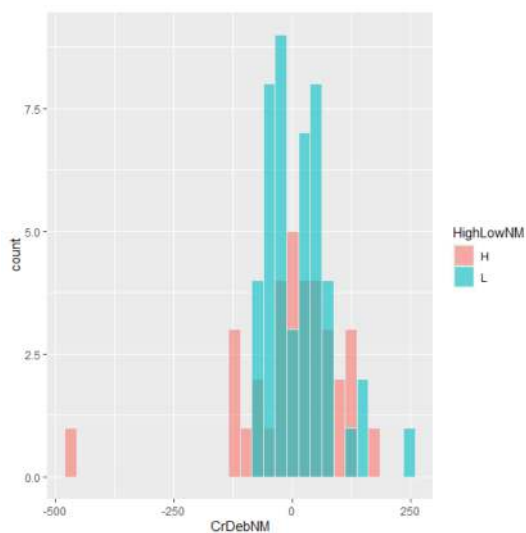

Fig. S3. Histogram Credit/Debit New Mexico, High and Low, thousand-acre feet (KAF)

Considering the hydrological conditions called Early and Late, for Colorado, Figure S4, the E distribution has a larger spread than the La distribution which is consistent with the values of the descriptive statistics of range (377 KAF, 268 KAF, 465,022,653 and 330,573,132 m<sup>3</sup>), SD (70, 45), and IQR (67 KAF, 9 KAF, 82,643,283 and 11,101,337 m<sup>3</sup>). The IQR for E is almost seven times larger than that of La. The E distribution is almost symmetrical while the La distribution is not.

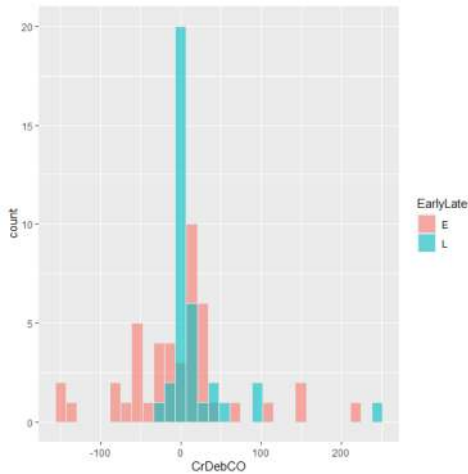

Fig. S4. Histogram Credit/Debit Colorado, Early and Late, thousand-acre feet (KAF)

Studying the same two series, Early and Late, for New Mexico, Figure S5, the La distribution appears to be more spread out than the E distribution since the debit for 1985 (-472 KAF, -582,203,427 m<sup>3</sup>) is three times larger than the second largest debit (-114 KAF, -140,616,929 m<sup>3</sup>) in 1995. The SD of the La distribution (112) is almost double the SD of E (60). The La distribution is skewed to the left, with a median (25 KAF, 30,837,046 m<sup>3</sup>) larger than the mean (18 KAF, 22,202,673 m<sup>3</sup>), while E seems symmetrical, with close median (1.2 KAF, 22,202,673 m<sup>3</sup>) and mean (-0.28 KAF, -345,375 m<sup>3</sup>). The range of La is more than 3 times larger of that of E (715 KAF, 275 KAF, 881,939,514 and 339,207,505 m<sup>3</sup>). The IQRs for La and E are 109 KAF (134,449,520 m<sup>3</sup>) and 96 KAF (118,414,256 m<sup>3</sup>), respectively.

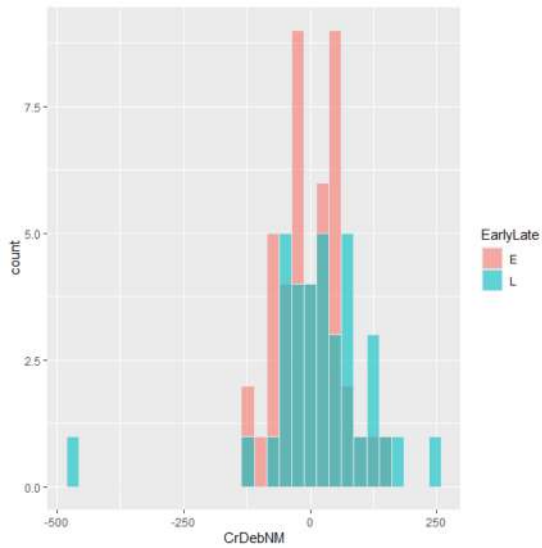

Fig. S5. Histogram Credit/Debit New Mexico, Early and Late, thousand-acre feet (KAF)

#### 4.4. Autocorrelation

The Autocorrelation Function (ACF) gives the values of autocorrelation of the series with its lagged values. The ACF plot uses confidence bands (dotted blue lines) to aid in the identification of significant, or not significant, autocorrelation for specific lags; this is if they are significantly different from zero. Figure S6 illustrates if the present value of the Colorado credit/debit series is related with its past values. The ACF shows that the current series is positively correlated to two past series with lag 1 and lag 2. In turn, Figure S7 is a visual summary of the linear correlations between Scheduled Delivery and credit/debit for Colorado. The significance levels were set at p-values of  $< 0.05$  and  $< 0.01$ , and the significant correlations were indicated by the larger size of the number and the darker shade of the square. Two lags were considered for each time series.

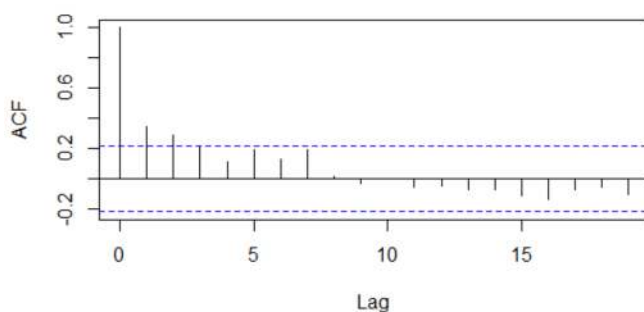

Fig. S6 Autocorrelation Function (ACF) for Colorado Credit/Debit Time Series

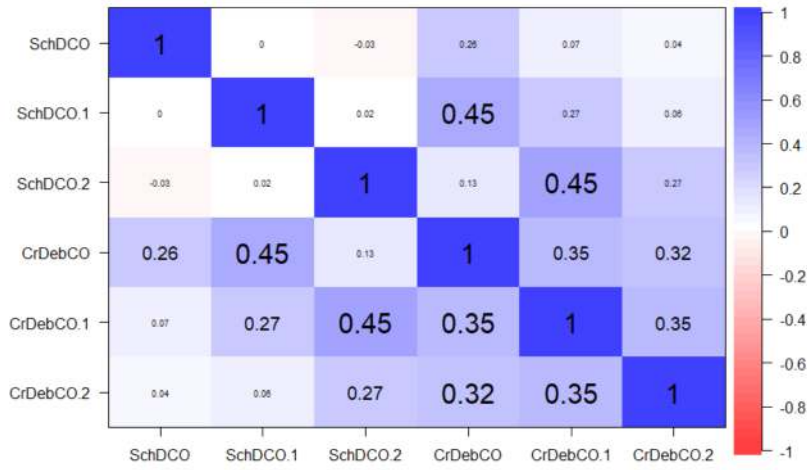

Fig. S7. Correlation plot between Scheduled Delivery and Credit and Debit for Colorado

Figure S8 shows the autocorrelation function for the credit/debit time series for New Mexico. The ACF shows that there is no evidence of autocorrelation of the series with its past values since none of the lags considered are outside of the bands. Figure S9 is the correlation plot between Scheduled Delivery and credit/debit for New Mexico. Two lags were considered for each time series. The plot shows that the series credit/debit for New Mexico (CrDebNM) is not significantly correlated with Schedule Delivery (SchDNM) or its lags (SchDNM.1 and SchDNM.2), nor is it significantly correlated to its own lags (CrDebNM.1, CrDebNM.2). There is only evidence of significant correlation between Schedule Delivery lag 1 (SchDNM.1) and its lag 2 (SchDNM.2).

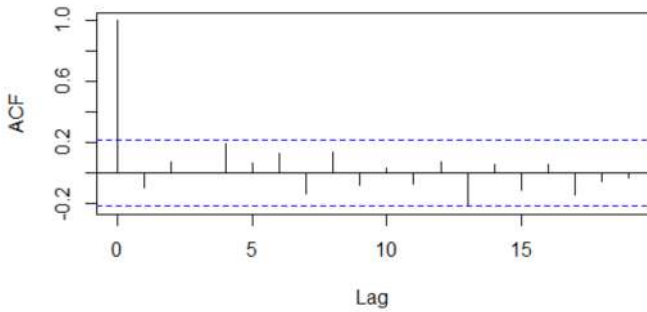

Fig. S8. Autocorrelation Function (ACF) for New Mexico Credit/Debit Time Series

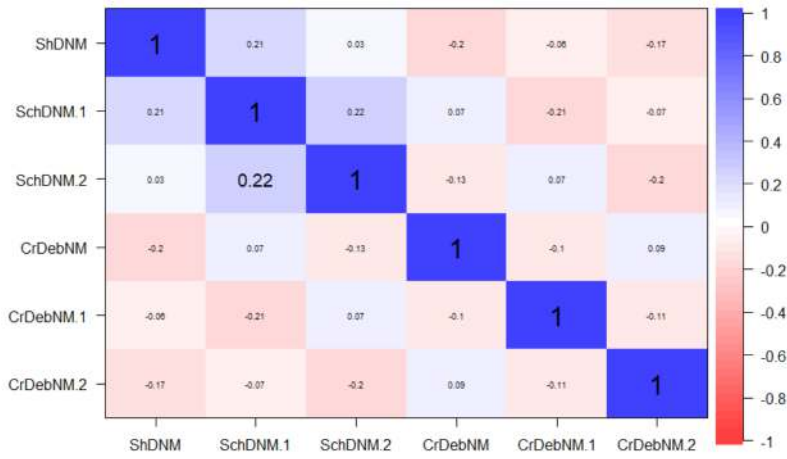

Fig. S9. Correlation plot between Schedule Delivery and Credit/Debit for New Mexico

## 5. Colorado

### 5.1. Prewhitening

The pre-whitening process detects the cross-correlation between the input and output series using the plot. The cross-correlation between prewhitened input and output series determined the parameters  $b=1$  and  $s=0$ , Figure S10.

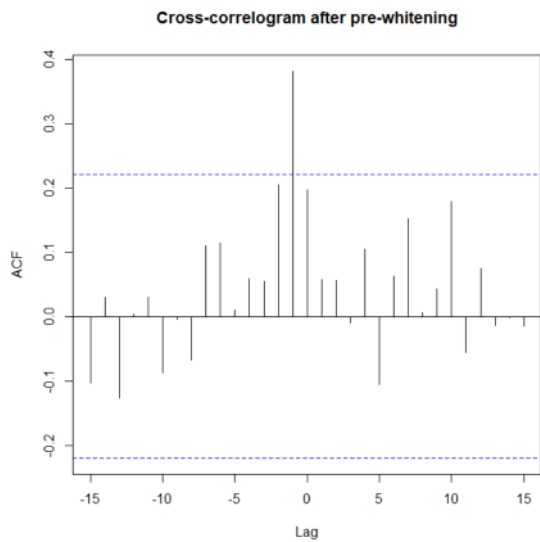

Fig. S10. Cross-correlation between Prewhitened Input and Fitted Output Series Colorado

### 5.2. Model selection.

Model 1 has the least AIC (863) and MAPE (310), Table S6. For RMSE, model 2 is slightly better (49.81 for model 2, 49.92 for model 1). Two additional variables were added, at a time, to the model 1: High and Low, Early and Late, to determine if there were any changes in parameter estimation. The same three model evaluation criteria were used. The AIC (858), RMSE (48), and MAPE (289) were

smaller for model 1 HighLow than for the other models. HighLow is statistically significant as predictor of credit/debit behavior in Colorado. The last model with EarlyLate is not statistically significant for explaining credit/debit behavior for Colorado.

Table S6. Parameter Estimates of Transfer Function Model for Colorado

| Model               | (b, r, s) | Parameter      | Estimate | Standard error | AIC           | RMSE         | MAPE          |
|---------------------|-----------|----------------|----------|----------------|---------------|--------------|---------------|
| Model 1             | (1, 1, 0) | $\omega_0$     | 0.1161   | 0.0305         | <b>863.06</b> | 49.92        | <b>310.99</b> |
|                     |           | $\delta_1$     | 0.1441   | 0.3068         |               |              |               |
|                     |           |                | 2492     |                |               |              |               |
|                     |           | $\sigma^2$     |          |                |               |              |               |
| Model 2             | (1, 2, 0) | $\omega_0$     | 0.1196   | 0.0313         | 864.68        | <b>49.81</b> | 317.92        |
|                     |           | $\delta_1$     | 0.1075   | 0.2648         |               |              |               |
|                     |           | $\delta_2$     | 0.1619   | 0.2691         |               |              |               |
|                     |           |                | 2481     |                |               |              |               |
|                     |           | $\sigma^2$     |          |                |               |              |               |
| Model 1 + HighLow   | (1, 1, 0) | $\omega_0$     | 0.1279   | 0.0293         | 858.97        | 48.08        | 289.89        |
|                     |           | $\delta_1$     | 0.2977   | 0.2705         |               |              |               |
|                     |           | High vs. Low   | 27.891   | 11.2044        |               |              |               |
|                     |           | $\sigma^2$     | 2312     |                |               |              |               |
| Model 1 + EarlyLate | (1, 1, 0) | $\omega_0$     | 0.1138   | 0.0306         | 864.24        | 49.66        | 329.75        |
|                     |           | $\delta_1$     | 0.1238   | 0.3137         |               |              |               |
|                     |           | Late vs. Early | 23.3012  | 27.1334        |               |              |               |
|                     |           | $\sigma^2$     | 2467     |                |               |              |               |

6. New Mexico Prewhitening and model selection, refer to Figure S11.

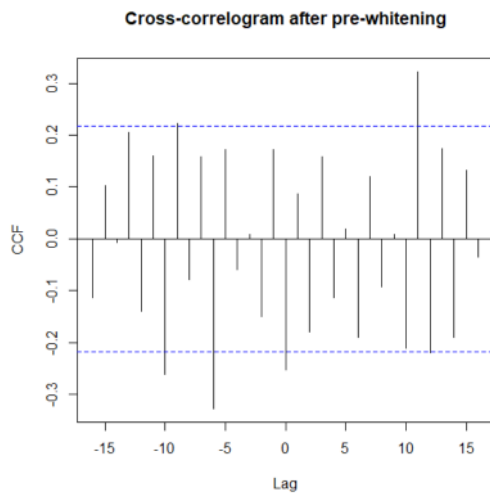

Fig. S11. Cross-correlation between Prewhitened Input and Fitted Output Series New Mexico

## REFERENCES

- Box, G.E.P. and Jenkins, G.M. (1976). *Time Series Analysis: Forecasting and Control*. Revised Edition, Holden Day, San Francisco.
- Quilez, D., Aragiies, R., Tanji, K. (1992). "Salinity of Rivers: Transfer Function-Noise Approach." *Journal of Irrigation and Drainage Engineering*, 118 (3). [https://doi.org/10.1061/\(ASCE\)0733-9437\(1992\)118:3\(343\)](https://doi.org/10.1061/(ASCE)0733-9437(1992)118:3(343)).
- Rio Grande Compact Report. (2020). *Commission Reports 1939-2020*, [https://www.ose.state.nm.us/Compacts/RioGrande/isc\\_rio\\_grande\\_tech\\_compact\\_reports.php](https://www.ose.state.nm.us/Compacts/RioGrande/isc_rio_grande_tech_compact_reports.php)
- Salmani, M. H., Jajaei E.S. (2016). "Forecasting models for flow and total dissolved solids in Karoun river-Iran." *Journal of Hydrology*. 535. 148–159. 10.1016/j.jhydrol.2016.01.085.
